# Supplementary material
Source: Springer Nature journal article supplement (https://www.springermedizin.de/resource/supplementary/13049_2011_291_MOESM4_ESM.pdf/9666278)

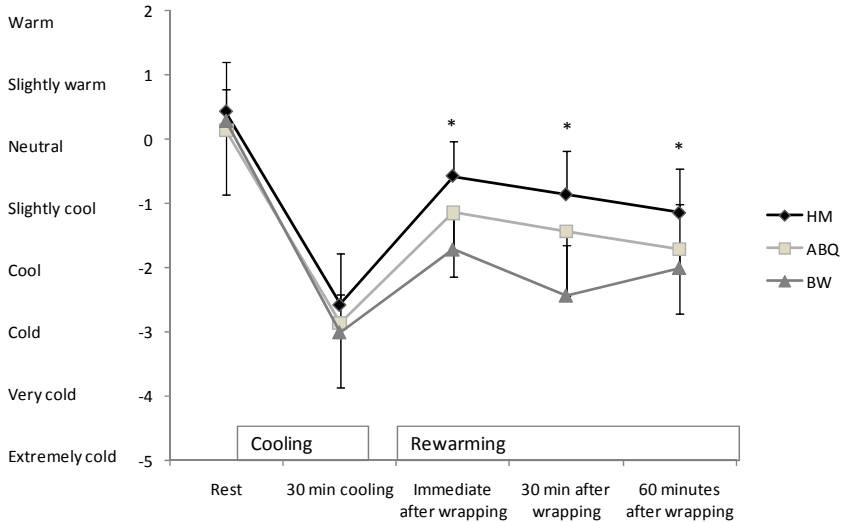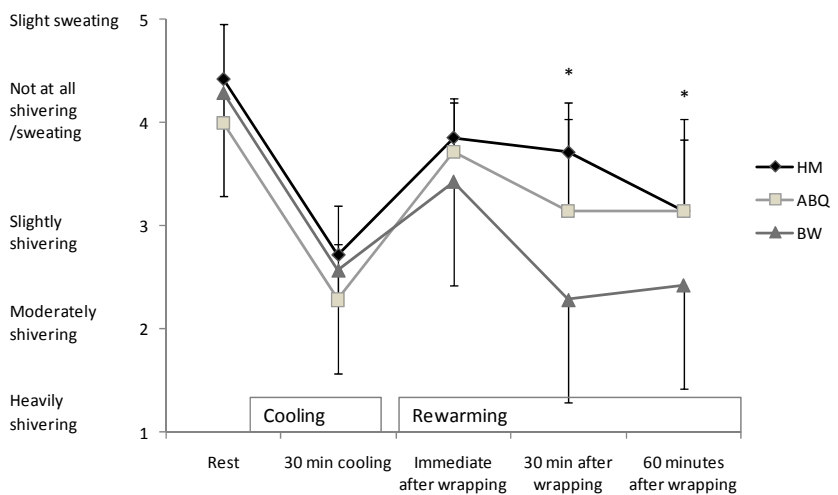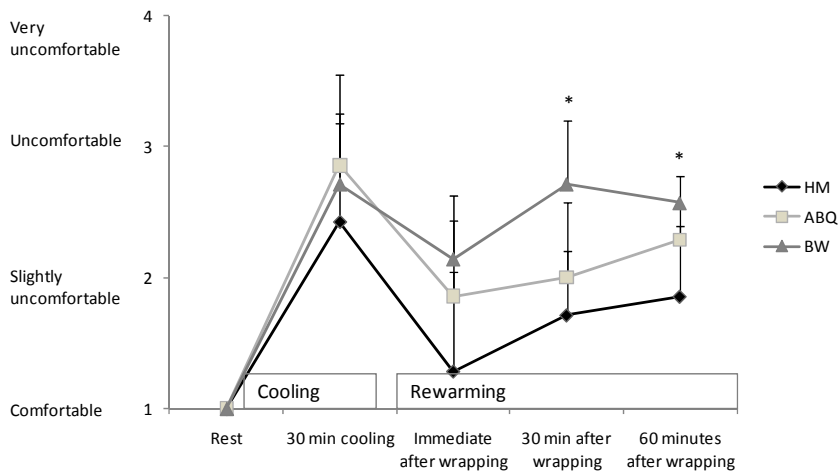

Supplement: MOESM4 [file 9666278]
